# Supplementary material for: Electrochemical performance of carbon/Ni composite fibers from electrospinning as anode material for lithium ion batteries
Source: Royal Society of Chemistry journal article supplement (doi:10.1039/c2ta00487a), 2012-11-08
Supplement: c2ta00487a.pdf [file c2ta00487a.pdf]

## Supporting Information:

### Electrochemical performance of carbon/Ni composite fibers from electrospinning as anode material for lithium ion batteries

Bin Wang <sup>a</sup>, Jianli Cheng<sup>\*b</sup>, Yuping Wu<sup>\*a,c</sup>, Dan Wang <sup>c</sup>, and Danong He <sup>c</sup>

<sup>a</sup> *New Energy and Materials Laboratory (NEML), Department of Chemistry and Shanghai Key Laboratory of Molecular Catalysis and Innovative Materials, Fudan University, No. 220, Handan Road, Shanghai 200433, China*

<sup>b</sup> *The Key Laboratory of Molecular Engineering of Polymers(MOE), Department of Macromolecular Science, Fudan University, No. 220, Handan Road, Shanghai 200433, China*

<sup>c</sup> *National Engineering Research Center for Nanotechnology, Shanghai, China*

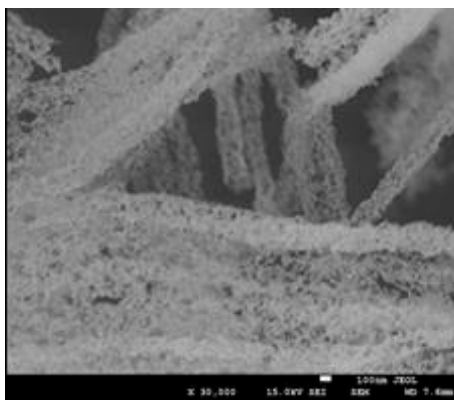

Figure S1 SEM micrograph of the prepared porous NiO fibers.

We removed the PAN in oxygen and only NiO porous fibers were obtained. After the removal of carbon, only NiO fibers were left. The pores were from the removal of carbon and the NiO was from the oxidation of the left Ni. The porous structure shows that the distribution of Ni is uniform as a network.

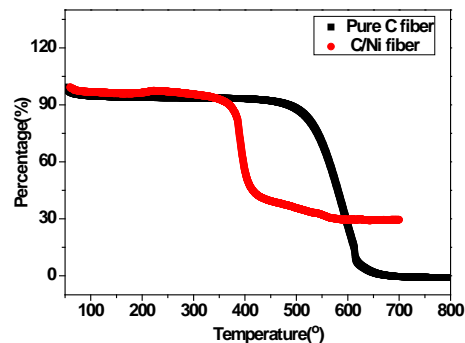

Figure S2 TGA plots of carbon fiber after annealing and pure carbon fiber.

The decomposition temperature of the carbon is greatly affected by incorporated nickel network.

Table S1 Surface (SSA) and pore parameters of carbon/Ni fiber.

| Pore | SSA ( $\text{m}^2\text{g}^{-1}$ ) | LSA ( $\text{m}^2\text{g}^{-1}$ ) | $S_{\text{BJH}}$ ( $\text{m}^2\text{g}^{-1}$ ) | $V_{\text{BJH}}$ ( $\text{m}^3/\text{g}$ ) | Adsorption average | $V_{\text{micro}}$ ( $\text{m}^3/\text{g}$ ) |
|------|-----------------------------------|-----------------------------------|------------------------------------------------|--------------------------------------------|--------------------|----------------------------------------------|
|      | 37.3                              | 50.22                             | 7.73                                           | 0.0177                                     | 9.14               | 0.01                                         |

Specific surface area (SSA) was calculated by the Brunauer-Emmett-Teller (BET) method.

LSA indicates Langmuir surface area.

$S_{\text{BJH}}$  indicates is the BJH Adsorption cumulative surface area of pores between 17 Å and 3000 Å diameter calculated by the Barret, Joyner, and Halenda (BJH) method.

$V_{\text{BJH}}$  is the BJH Adsorption cumulative volume of pores between 17 Å and 3000 Å diameter calculated by the BJH method.

$V_{\text{micro}}$  is the micropore volume calculated by the Horvath-Kawazoe (HK) method.

It can be seen that the carbon with Ni composite fiber has a large specific surface area.

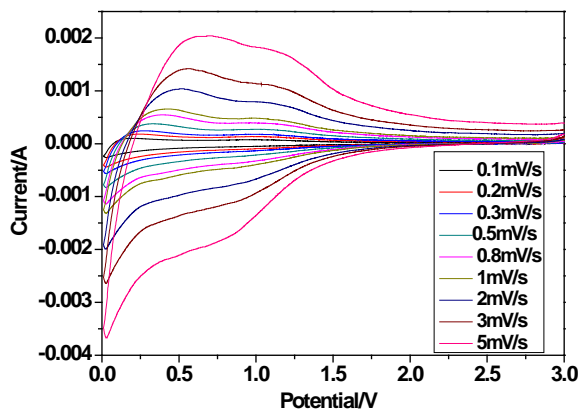

Figure S3 The CV profiles of carbon/Ni composite fiber obtained at the scan rate from 0.1 mV/s to 5 mV/s.

Even at high scan rate of 5 mV/s, the distinct redox reaction peaks at near 0.5 V corresponding to the intercalation/deintercalation of  $\text{Li}^+$  into/from the carbon electrode are still well maintained, demonstrating fast Li-storage capability.
